# Supplementary material for: Preventing cardiovascular disease after hypertensive disorders of pregnancy: Searching for the how and when
Source: PubMed Central journal article supplement — Eur J Prev Cardiol. 2017 Sep 12;24(16):1735–45. doi: 10.1177/2047487317730472 (PMC5669282; doi:10.1177/2047487317730472), 2017-09-12
Supplement: supplementary_material.pdf [file supplementary_material.pdf]

## Supplement 1. Search strategies

|                  | Determinant                                                                                                                                                                                                                                                                                                                                                                                                                                                                                                                                                                                                                                                                                                                                                                                                                                                                                 | Determinant (2)                                                                                                                                                                                                                                                                      | Outcome                                                                                                                                                                                                                                  |
|------------------|---------------------------------------------------------------------------------------------------------------------------------------------------------------------------------------------------------------------------------------------------------------------------------------------------------------------------------------------------------------------------------------------------------------------------------------------------------------------------------------------------------------------------------------------------------------------------------------------------------------------------------------------------------------------------------------------------------------------------------------------------------------------------------------------------------------------------------------------------------------------------------------------|--------------------------------------------------------------------------------------------------------------------------------------------------------------------------------------------------------------------------------------------------------------------------------------|------------------------------------------------------------------------------------------------------------------------------------------------------------------------------------------------------------------------------------------|
| <b>Pubmed:</b>   | ((((("hypertension, pregnancy induced"[MeSH Terms]) OR "gestational hypertension"[Title/Abstract]) OR "hypertension, gestational"[Title/Abstract]) OR "pregnancy transient hypertension"[Title/Abstract]) OR "pregnancy induced hypertension"[Title/Abstract]) OR (((((((("pre eclampsia"[MeSH Terms]) OR "pre eclampsia"[Title/Abstract]) OR "eph complex"[Title/Abstract]) OR "eph gestosis 1970 1978"[Title/Abstract]) OR "eph toxemia"[Title/Abstract]) OR "toxemia of pregnancy"[Title/Abstract]) OR "preeclampsia"[Title/Abstract]) OR "pregnancy toxemias"[Title/Abstract]) OR "pregnancy toxemia"[Title/Abstract]) OR "edema proteinuria hypertension gestosis"[Title/Abstract]) OR "edema proteinuria hypertension syndrome"[Title/Abstract]) OR (("eclampsia"[MeSH Terms]) OR "eclampsia"[Title/Abstract]) OR ("hellp syndrome"[MeSH Terms]) OR "hellp syndrome"[Title/Abstract]) | Search (((((((("history of"[Title/Abstract]) OR "previous"[Title/Abstract]) OR "subsequent"[Title/Abstract]) OR "after"[Title/Abstract]) OR "postpartum period"[Title/Abstract]) OR "longterm"[Title/Abstract]) OR "later in life"[Title/Abstract]) OR "postpartum"[Title/Abstract]) | ((((("hypertension"[MeSH Terms]) OR "blood pressure, high"[Title/Abstract]) OR "high blood pressure"[Title/Abstract]) OR "hypertension"[Title/Abstract]) OR "systolic pressure"[Title/Abstract]) OR "diastolic pressure"[Title/Abstract] |
| <b>Cochrane:</b> | Hypertension, Pregnancy Induced:ti,ab OR Pregnancy-Induced Hypertension:ti,ab OR Pregnancy Induced Hypertension:ti,ab Gestational Hypertension:ti,ab OR Hypertension, Gestational:ti,ab OR Transient Hypertension, Pregnancy:ti,ab OR Hypertension, Pregnancy Transient:ti,ab OR Pregnancy Transient Hypertension:ti,ab OR pre Eclampsia:ti,ab OR Pre-eclampsia:ti,ab OR EPH Gestosis:ti,ab OR EPH Toxemia:ti,ab OR Toxemia, EPH:ti,ab OR Toxemias, EPH:ti,ab OR Gestosis, EPH:ti,ab OR Toxemia Of Pregnancy:ti,ab OR Preeclampsia:ti,ab OR Pregnancy Toxemias:ti,ab OR Pregnancy Toxemia:ti,ab OR Toxemia, Pregnancy:ti,ab OR Toxemias, Pregnancy:ti,ab OR Eclampsia:ti,ab OR HELLP Syndrome:ti,ab OR Syndrome, HELLP:ti,ab                                                                                                                                                                | 'History of' :ti,ab OR 'Previous' :ti,ab OR 'subsequent' :ti,ab OR 'After' :ti,ab OR 'Follow up' :ti,ab OR 'Follow up studies' :ti,ab OR 'Postpartum' :ti,ab                                                                                                                         | Hypertension:ti,ab OR high blood pressure:ti,ab OR blood pressure:ti,ab OR systolic pressure:ti,ab OR diastolic pressure:ti,ab                                                                                                           |
| <b>Embase:</b>   | 'pre eclampsia'/exp OR 'pre eclampsia':ab,ti OR 'pre-eclampsia':ab,ti OR 'pre-eclamptic toxemia':ab,ti OR 'pre-eclamptic toxemia':ab,ti OR 'preclampsia':ab,ti OR 'preeclamptic toxemia':ab,ti OR 'preeclamptic toxemia':ab,ti OR 'toxaemia, preeclamptic':ab,ti OR 'toxemia, Preeclamptic':ab,ti OR 'eclampsia'/exp OR 'eclampsia':ab,ti OR 'puerperal tetany':ab,ti OR 'maternal hypertension'/exp OR 'gestational hypertension':ab,ti OR 'hypertension in pregnancy':ab,ti OR 'hypertension, pregnancy induced':ab,ti OR 'hypertension, pregnancy-induced':ab,ti OR 'hypertension, maternal':ab,ti OR 'pregnancy hypertension':ab,ti OR 'pregnancy induced hypertension':ab,ti OR 'HELLP syndrome'/exp OR 'hemolysis, elevated liver enzymes, low platelet count syndrome':ab,ti OR 'syndrome HELLP':ab,ti AND [embase]/lim NOT [medline]/lim                                            | 'History of':ab,ti OR 'Previous':ab,ti OR 'subsequent':ab,ti OR 'After':ab,ti OR 'Follow up':ab,ti OR 'Follow up studies':ab,ti OR 'Postpartum':ab,ti                                                                                                                                | 'hypertension'/exp 'hypertension':ab,ti 'high blood pressure':ab,ti 'systolic pressure':ab,ti 'diastolic pressure':ab,ti 'blood pressure':ab,ti                                                                                          |

| Determinant      | Determinant (2)                                                                                                                                                                                                                                                                                                                                                                                                                                                                                                                                                                                                                                                                                                                                                                                                                                                                        | Outcome                                                                                                                                                                                                                                                                      |                                                                                                                                                                                                                                                                                                                                                                                                                                                                                                                                                                                                                                                                                                                                                                                                                                                                                                                                                                                                                                                                                                                                                                                                                                                                                                                                                                                                                                                                                                                                                                                                                                                                                                                                                                                                                                                                                          |
|------------------|----------------------------------------------------------------------------------------------------------------------------------------------------------------------------------------------------------------------------------------------------------------------------------------------------------------------------------------------------------------------------------------------------------------------------------------------------------------------------------------------------------------------------------------------------------------------------------------------------------------------------------------------------------------------------------------------------------------------------------------------------------------------------------------------------------------------------------------------------------------------------------------|------------------------------------------------------------------------------------------------------------------------------------------------------------------------------------------------------------------------------------------------------------------------------|------------------------------------------------------------------------------------------------------------------------------------------------------------------------------------------------------------------------------------------------------------------------------------------------------------------------------------------------------------------------------------------------------------------------------------------------------------------------------------------------------------------------------------------------------------------------------------------------------------------------------------------------------------------------------------------------------------------------------------------------------------------------------------------------------------------------------------------------------------------------------------------------------------------------------------------------------------------------------------------------------------------------------------------------------------------------------------------------------------------------------------------------------------------------------------------------------------------------------------------------------------------------------------------------------------------------------------------------------------------------------------------------------------------------------------------------------------------------------------------------------------------------------------------------------------------------------------------------------------------------------------------------------------------------------------------------------------------------------------------------------------------------------------------------------------------------------------------------------------------------------------------|
| <b>Pubmed:</b>   | ((((("hypertension, pregnancy induced"[MeSH Terms]) OR "gestational hypertension"[Title/Abstract] OR "hypertension, gestational"[Title/Abstract] OR "pregnancy transient hypertension"[Title/Abstract] OR "pregnancy induced hypertension"[Title/Abstract])) OR (((((((("pre eclampsia"[MeSH Terms]) OR "pre eclampsia"[Title/Abstract] OR "eph complex"[Title/Abstract] OR "eph gestosis 1970 1978"[Title/Abstract] OR "eph toxemia"[Title/Abstract] OR "toxemia of pregnancy"[Title/Abstract] OR "preeclampsia"[Title/Abstract] OR "pregnancy toxemias"[Title/Abstract] OR "pregnancy toxemia"[Title/Abstract] OR "edema proteinuria hypertension gestosis"[Title/Abstract] OR "edema proteinuria hypertension syndrome"[Title/Abstract])) OR ((("eclampsia"[MeSH Terms]) OR "eclampsia"[Title/Abstract])) OR ((("hellp syndrome"[MeSH Terms]) OR "hellp syndrome"[Title/Abstract])) | Search (((((((("history of"[Title/Abstract] OR "previous"[Title/Abstract] OR "subsequent"[Title/Abstract] OR "after"[Title/Abstract] OR "postpartum period"[Title/Abstract] OR "longterm"[Title/Abstract] OR "later in life"[Title/Abstract] OR "postpartum"[Title/Abstract] | ((((((((((((((((((((((((((((((((("dyslipidemias"[MeSH Terms]) OR "dyslipoproteinemias"[Title/Abstract] OR "dyslipoproteinemia"[Title/Abstract] OR "hyperlipidemias"[Title/Abstract] OR "hyperlipemia"[Title/Abstract] OR "hyperlipemias"[Title/Abstract] OR "hyperlipidemia"[Title/Abstract] OR "lipidemia"[Title/Abstract] OR "lipidemic"[Title/Abstract] OR "lipemia"[Title/Abstract] OR "lipemias"[Title/Abstract] OR "hypercholesterolemia"[MeSH Terms]) OR "hypercholesterolemias"[Title/Abstract] OR "elevated cholesterol"[Title/Abstract] OR "hypercholesteremia"[Title/Abstract] OR "hypercholesteremias"[Title/Abstract] OR "hypertriglyceridemia"[MeSH Terms] OR "hypertriglyceridemias"[Title/Abstract] OR "hypertriglyceridemia"[Title/Abstract] OR "lipoproteins, hdl"[MeSH Terms] OR "hdl lipoproteins"[Title/Abstract] OR "heavy lipoproteins"[Title/Abstract] OR "high density lipoproteins"[Title/Abstract] OR "alpha lipoproteins"[Title/Abstract] OR "alpha 1 lipoprotein"[Title/Abstract] OR "alpha lipoproteins"[Title/Abstract] OR "cholesterol, ldl"[MeSH Terms] OR "alpha lipoprotein cholesterol"[Title/Abstract] OR "hdl cholesterol"[Title/Abstract] OR "high density lipoprotein cholesterol"[Title/Abstract] OR "cholesterol, high density lipoprotein"[Title/Abstract] OR "cholesterol, high density"[Title/Abstract] OR "lipoproteins, ldl"[MeSH Terms] OR "ldl lipoproteins"[Title/Abstract] OR "low density lipoproteins"[Title/Abstract] OR Low Density Lipoproteins[Title/Abstract] OR "beta lipoproteins"[Title/Abstract] OR "beta lipoproteins"[Title/Abstract] OR "cholesterol, ldl"[MeSH Terms] OR "low density lipoprotein cholesterol"[Title/Abstract] OR "beta lipoprotein cholesterol"[Title/Abstract] OR "ldl cholesterol"[Title/Abstract] OR "beta lipoprotein cholesterol"[Title/Abstract] OR "ldl cholesteryl linoleate"[Title/Abstract] |
| <b>Cochrane:</b> | Hypertension, Pregnancy Induced:ti,ab OR Pregnancy-Induced Hypertension:ti,ab OR Pregnancy Induced Hypertension:ti,ab OR Gestational Hypertension:ti,ab OR Hypertension, Gestational:ti,ab OR Transient Hypertension, Pregnancy:ti,ab OR Hypertension, Pregnancy Transient:ti,ab OR Pregnancy Transient Hypertension:ti,ab OR pre Eclampsia:ti,ab OR Pre-eclampsia:ti,ab OR EPH Gestosis:ti,ab OR EPH Toxemia:ti,ab OR Toxemia, EPH:ti,ab OR Toxemias, EPH:ti,ab OR Gestosis, EPH:ti,ab OR Toxemia Of Pregnancy:ti,ab OR Preeclampsia:ti,ab OR Pregnancy Toxemias:ti,ab OR Pregnancy Toxemia:ti,ab OR Toxemia, Pregnancy:ti,ab OR Toxemias, Pregnancy:ti,ab OR Eclampsia:ti,ab OR HELLP Syndrome:ti,ab OR Syndrome, HELLP:ti,ab                                                                                                                                                        | ‘History of’ :ti,ab OR ‘Previous’ :ti,ab OR ‘subsequent’ :ti,ab OR ‘After’ :ti,ab OR ‘Follow up’ :ti,ab OR ‘Follow up studies’ :ti,ab OR ‘Postpartum’ :ti,ab                                                                                                                 | Dyslipidemia:ti,ab OR Dyslipidaemia:ti,ab OR Hyperlipemia:ti,ab OR Lipidemias:ti,ab OR Hypercholesteremias: ti,ab OR tryglycerids:ti,ab OR Hypertriglyceridemia:ti,ab OR Hypertriglyceridemias:ti,ab OR HDL Lipoproteins:ti,ab OR Heavy Lipoproteins:ti,ab O High-Density Lipoproteins:ti,ab OR High Density Lipoproteins:ti,ab OR High Density Lipoprotein Cholesterol OR Lipoproteins, LDL:ti,ab OR LDL Lipoproteins:ti,ab OR Lipoproteins, Low-Density:ti,ab OR Low Density Lipoproteins:ti,ab OR Low Density Lipoprotein Cholesterol:ti,ab                                                                                                                                                                                                                                                                                                                                                                                                                                                                                                                                                                                                                                                                                                                                                                                                                                                                                                                                                                                                                                                                                                                                                                                                                                                                                                                                           |
| <b>Embase:</b>   | ‘pre eclampsia’/exp OR ‘pre eclampsia’:ab,ti OR ‘pre-eclampsia’:ab,ti OR ‘pre-eclamptic toxemia’:ab,ti OR ‘pre-eclamptic toxemia’:ab,ti OR ‘preclamptic toxemia’:ab,ti OR ‘preeclamptic toxemia’:ab,ti OR ‘toxaemia, preeclamptic’:ab,ti OR ‘toxemia, Preeclamptic’:ab,ti OR ‘eclampsia’/exp OR ‘eclampsia’:ab,ti OR ‘puerperal tetany’:ab,ti OR ‘maternal hypertension’/exp OR ‘gestational hypertension’:ab,ti OR ‘hypertension in pregnancy’:ab,ti OR ‘hypertension, pregnancy induced’:ab,ti OR ‘hypertension, pregnancy-induced’:ab,ti OR ‘hypertension, maternal’:ab,ti OR ‘pregnancy hypertension’:ab,ti OR ‘pregnancy induced hypertension’:ab,ti OR ‘HELLP syndrome’/exp OR ‘hemolysis, elevated liver enzymes, low platelet count syndrome’:ab,ti OR ‘syndrome HELLP’:ab,ti AND [embase]/lim NOT [medline]/lim                                                               | ‘History of’:ab,ti OR ‘Previous’:ab,ti OR ‘subsequent’:ab,ti OR ‘After’:ab,ti OR ‘Follow up’:ab,ti OR ‘Follow up studies’:ab,ti OR ‘Postpartum’:ab,ti                                                                                                                        | ‘hypercholesterolemia’/exp OR ‘hypercholesterolemia’:ab,ti OR ‘hypercholesterolaemia’:ab,ti OR ‘cholesteremia’:ab,ti OR ‘cholesterinemia’:ab,ti OR ‘cholesterolemia’:ab,ti OR ‘hypercholesteremia’:ab,ti OR ‘hypercholesterinaemia’:ab,ti OR ‘hypercholesterinemia’:ab,ti OR ‘hypercholesterolaemia’:ab,ti OR ‘hypertriglyceridemia’:ab,ti OR ‘hypertriglyceridaemia’:ab,ti OR ‘high density lipoprotein’/exp OR ‘high density lipoprotein’:ab,ti OR ‘high density lipoprotein cholesterol’/exp OR ‘high density lipoprotein cholesterol’:ab,ti OR ‘HDL cholesterol’:ab,ti OR ‘HDL cholesterol’:ab,ti OR ‘cholesterol’:ab,ti OR ‘low density lipoprotein’/exp OR ‘low density lipoprotein’:ab,ti OR ‘low density lipoprotein cholesterol’/exp OR ‘low density lipoprotein cholesterol’:ab,ti OR ‘LDL’:ab,ti OR ‘LDL cholesterol’:ab,ti OR ‘dyslipidemia’/exp OR ‘dyslipidemia’:ab,ti OR ‘dyslipidaemia’:ab,ti OR ‘Lipid’:ab,ti                                                                                                                                                                                                                                                                                                                                                                                                                                                                                                                                                                                                                                                                                                                                                                                                                                                                                                                                                           |

| Determinant                                                                                                                                                                                                                                                                                                                                                                                                                                                                                                                                                                                                                                                                                                                                                                                                                                                                                                            | Determinant (2)                                                                                                                                                                                                                                                                             | Outcome                                                                                                                                                                                                                                                                                                                                                                                                                                                                                                                                                                                                                                                                                                                                                                                                                                                                                                                                                                                                                                                                                                                                                                                                                                                                                                            |
|------------------------------------------------------------------------------------------------------------------------------------------------------------------------------------------------------------------------------------------------------------------------------------------------------------------------------------------------------------------------------------------------------------------------------------------------------------------------------------------------------------------------------------------------------------------------------------------------------------------------------------------------------------------------------------------------------------------------------------------------------------------------------------------------------------------------------------------------------------------------------------------------------------------------|---------------------------------------------------------------------------------------------------------------------------------------------------------------------------------------------------------------------------------------------------------------------------------------------|--------------------------------------------------------------------------------------------------------------------------------------------------------------------------------------------------------------------------------------------------------------------------------------------------------------------------------------------------------------------------------------------------------------------------------------------------------------------------------------------------------------------------------------------------------------------------------------------------------------------------------------------------------------------------------------------------------------------------------------------------------------------------------------------------------------------------------------------------------------------------------------------------------------------------------------------------------------------------------------------------------------------------------------------------------------------------------------------------------------------------------------------------------------------------------------------------------------------------------------------------------------------------------------------------------------------|
| <p><b>Pubmed:</b> (((((((("hypertension, pregnancy induced"[MeSH Terms]) OR "gestational hypertension"[Title/Abstract]) OR "hypertension, gestational"[Title/Abstract]) OR "pregnancy transient hypertension"[Title/Abstract]) OR "pregnancy induced hypertension"[Title/Abstract])) OR (((((((("pre eclampsia"[MeSH Terms]) OR "pre eclampsia"[Title/Abstract]) OR "eph complex"[Title/Abstract]) OR "eph gestosis 1970 1978"[Title/Abstract]) OR "eph toxemia"[Title/Abstract]) OR "toxemia of pregnancy"[Title/Abstract]) OR "preeclampsia"[Title/Abstract]) OR "pregnancy toxemias"[Title/Abstract]) OR "pregnancy toxemia"[Title/Abstract]) OR "edema proteinuria hypertension gestosis"[Title/Abstract]) OR "edema proteinuria hypertension syndrome"[Title/Abstract])) OR (("eclampsia"[MeSH Terms]) OR "eclampsia"[Title/Abstract]) OR ("hellp syndrome"[MeSH Terms]) OR "hellp syndrome"[Title/Abstract])</p> | <p>Search (((((((("history of"[Title/Abstract]) OR "previous"[Title/Abstract]) OR "subsequent"[Title/Abstract]) OR "after"[Title/Abstract]) OR "postpartum period"[Title/Abstract]) OR "longterm"[Title/Abstract]) OR "later in life"[Title/Abstract]) OR "postpartum"[Title/Abstract])</p> | <p>Search (((((((((((((((((((("diabetes mellitus"[MeSH Terms]) OR "diabetes mellitus"[Title/Abstract]) OR "disorder, diabetes mellitus"[Title/Abstract]) OR "glucose metabolic disorders"[Title/Abstract]) OR "glucose metabolism disorder"[Title/Abstract]) OR "glucose metabolic disorder"[Title/Abstract]) OR "glucose metabolic disorders"[Title/Abstract]) OR "glucose metabolic disorder"[Title/Abstract]) OR "glucose intolerance"[MeSH Terms]) OR "glucose intolerances"[Title/Abstract]) OR "glucose intolerance"[Title/Abstract]) OR "intolerancia a la glucosa"[Title/Abstract]) OR "hyperinsulinism"[MeSH Terms]) OR "hyperinsulinism"[Title/Abstract]) OR "hyperinsulinemia"[Title/Abstract]) OR "insulin resistance"[MeSH Terms]) OR "insulin resistance"[Title/Abstract]) OR "insulin sensitivity"[Title/Abstract]) OR "sensitivity, insulin"[Title/Abstract]) OR "resistance, insulin"[Title/Abstract]) OR "metabolic syndrome x"[MeSH Terms]) OR "metabolic syndrome x"[Title/Abstract]) OR "insulin resistance syndrome"[Title/Abstract]) OR "metabolic cardiovascular syndrome"[Title/Abstract]) OR "dysmetabolic syndrome"[Title/Abstract]) OR "cardiovascular syndrome, metabolic"[Title/Abstract]) OR "reaven's syndrome"[Title/Abstract]) OR "cardiometabolic syndrome"[Title/Abstract]</p> |
| <p><b>Cochrane:</b> Hypertension, Pregnancy Induced:ti,ab OR Pregnancy-Induced Hypertension:ti,ab OR Pregnancy Induced hypertension:ti,ab OR Gestational Hypertension:ti,ab OR Hypertension, Gestational:ti,ab OR Transient Hypertension, Pregnancy:ti,ab OR Hypertension, Pregnancy Transient:ti,ab OR Pregnancy Transient Hypertension:ti,ab OR pre Eclampsia:ti,ab OR Pre-eclampsia:ti,ab OR EPH Gestosis:ti,ab OR EPH Toxemia:ti,ab OR Toxemia, EPH:ti,ab OR Toxemias, EPH:ti,ab OR Gestosis, EPH:ti,ab OR Toxemia Of Pregnancy:ti,ab OR Preeclampsia:ti,ab OR Pregnancy Toxemias:ti,ab OR Pregnancy Toxemia:ti,ab OR Toxemia, Pregnancy:ti,ab OR Toxemias, Pregnancy:ti,ab OR Eclampsia:ti,ab OR HELLP Syndrome:ti,ab OR Syndrome, HELLP:ti,ab</p>                                                                                                                                                                | <p>'History of' :ti,ab OR 'Previous' :ti,ab OR 'subsequent' :ti,ab OR 'After' :ti,ab OR 'Follow up' :ti,ab OR 'Follow up studies' :ti,ab OR 'Postpartum' :ti,ab</p>                                                                                                                         | <p>Diabetes mellitus:ti,ab OR Disorder, Glucose Metabolism:ti,ab OR Disorders, Glucose Metabolism:ti,ab OR Metabolism Disorders, Glucose:ti,ab OR Glucose Metabolic Disorders:ti,ab OR Disorder, Glucose Metabolic:ti,ab OR Disorders, Glucose Metabolic:ti,ab OR Metabolic Disorder, Glucose:ti,ab OR Hyperinsulinemia:ti,ab OR Resistance, Insulin:ti,ab OR Insulin Sensitivity:ti,ab OR Sensitivity, Insulin:ti,ab OR Insulin Resistance Syndrome X:ti,ab OR Syndrome X, Metabolic:ti,ab OR Syndrome X, Insulin Resistance:ti,ab OR Metabolic X Syndrome:ti,ab OR Syndrome, Metabolic X:ti,ab OR X Syndrome, Metabolic:ti,ab OR Metabolic Cardiovascular Syndrome:ti,ab OR Cardiovascular Syndrome, Metabolic:ti,ab OR Cardiometabolic syndrome:ti,ab</p>                                                                                                                                                                                                                                                                                                                                                                                                                                                                                                                                                       |
| <p><b>Embase:</b> 'pre eclampsia'/exp OR 'pre eclampsia':ab,ti OR 'pre-eclampsia':ab,ti OR 'pre-eclamptic toxemia':ab,ti OR 'pre-eclamptic toxemia':ab,ti OR 'preclampsia':ab,ti OR 'preeclamptic toxemia':ab,ti OR 'preeclamptic toxemia':ab,ti OR 'toxaemia, preeclamptic':ab,ti OR 'toxemia, Preeclamptic':ab,ti OR 'eclampsia'/exp OR 'eclampsia':ab,ti OR 'puerperal tetany':ab,ti OR 'maternal hypertension'/exp OR 'gestational hypertension':ab,ti OR 'hypertension in pregnancy':ab,ti OR 'hypertension, pregnancy induced':ab,ti OR 'hypertension, pregnancy-induced':ab,ti OR 'hypertension, maternal':ab,ti OR 'pregnancy hypertension':ab,ti OR 'pregnancy induced hypertension':ab,ti OR 'HELLP syndrome'/exp OR 'hemolysis, elevated liver enzymes, low platelet count syndrome':ab,ti OR 'syndrome HELLP':ab,ti AND [embase]/lim NOT [medline]/lim</p>                                                 | <p>'History of':ab,ti OR 'Previous':ab,ti OR 'subsequent':ab,ti OR 'After':ab,ti OR 'Follow up':ab,ti OR 'Follow up studies':ab,ti OR 'Postpartum':ab,ti</p>                                                                                                                                | <p>'diabetes mellitus'/exp OR 'diabetes':ab,ti OR 'diabetic':ab,ti OR OR 'insulin insensitivity'/exp OR 'insulin insensitivity':ab,ti OR 'insulin resistance':ab,ti OR 'Insulin resistance syndrome':ab,ti OR 'glucose intolerance'/exp OR 'glucose intolerance':ab,ti OR 'Metabolic syndrome x'/exp OR 'Metabolic syndrome x':ab,ti OR 'syndrome x'/exp</p>                                                                                                                                                                                                                                                                                                                                                                                                                                                                                                                                                                                                                                                                                                                                                                                                                                                                                                                                                       |

## Supplement 2. Critical appraisal table and legend

| Study             |        |             |         |        |                     |                             |                         |                     |              |                   |
|-------------------|--------|-------------|---------|--------|---------------------|-----------------------------|-------------------------|---------------------|--------------|-------------------|
|                   | Domain | Determinant | Outcome | Design | Selective inclusion | Determinant standardization | Outcome Standardization | Confounding factors | Missing data | Loss to Follow up |
| Agatisa, 2004     | ●      | ●           | ○       | ◐      | ●                   | ●                           | ●                       | ◐                   | ●            | ●                 |
| Al Nasiry, 2014   | ●      | ●           | ●       | ●      | ◐                   | ●                           | ●                       | ●                   | ◐            | ●                 |
| Alsnes, 2014      | ●      | ●           | ●       | ●      | ◐                   | ●                           | ●                       | ●                   | ●            | ○                 |
| Andersgaard, 2012 | ●      | ●           | ●       | ◐      | ●                   | ◐                           | ●                       | ○                   | ●            | ○                 |
| Aykas, 2015       | ●      | ●           | ●       | ◐      | ●                   | ●                           | ◐                       | ○                   | ●            | ○                 |
| Barden, 1999      | ●      | ●           | ●       | ◐      | ◐                   | ●                           | ●                       | ○                   | ●            | ●                 |
| Barry, 2015       | ●      | ●           | ●       | ●      | ◐                   | ●                           | ●                       | ◐                   | ●            | ●                 |
| Blaauw, 2005      | ●      | ●           | ●       | ◐      | ●                   | ●                           | ●                       | ●                   | ●            | ●                 |
| Breetveld, 2015   | ●      | ●           | ●       | ●      | ●                   | ●                           | ●                       | ◐                   | ●            | ●                 |
| Brown, 2013       | ●      | ●           | ●       | ●      | ○                   | ○                           | ●                       | ●                   | ●            | ●                 |
| Callaway, 2007    | ●      | ◐           | ●       | ●      | ●                   | ●                           | ◐                       | ●                   | ○            | ○                 |
| Callaway, 2013    | ●      | ●           | ●       | ●      | ●                   | ●                           | ○                       | ●                   | ○            | ●                 |
| Canti, 2010       | ●      | ●           | ●       | ●      | ◐                   | ●                           | ●                       | ◐                   | ◐            | ◐                 |
| Carr, 2009        | ●      | ●           | ●       | ●      | ○                   | ◐                           | ○                       | ●                   | ◐            | ◐                 |
| Catov, 2008       | ●      | ◐           | ●       | ●      | ◐                   | ○                           | ◐                       | ●                   | ◐            | ◐                 |
| Chambers, 2011    | ●      | ●           | ●       | ◐      | ◐                   | ●                           | ●                       | ●                   | ○            | ◐                 |
| Collén, 2013      | ●      | ●           | ●       | ●      | ◐                   | ◐                           | ●                       | ◐                   | ●            | ◐                 |
| Drost, 2011       | ●      | ●           | ●       | ●      | ●                   | ●                           | ○                       | ●                   | ●            | ●                 |
| Drost 2012        | ●      | ●           | ●       | ●      | ●                   | ●                           | ●                       | ●                   | ●            | ●                 |
| Drost, 2013       | ●      | ◐           | ●       | ●      | ◐                   | ◐                           | ◐                       | ○                   | ●            | ●                 |
| Ehrental 2015     | ●      | ●           | ●       | ●      | ◐                   | ●                           | ●                       | ●                   | ●            | ●                 |
| Edlow, 2009       | ●      | ●           | ●       | ●      | ●                   | ●                           | ○                       | ○                   | ●            | ○                 |
| Engeland, 2011    | ●      | ●           | ●       | ●      | ●                   | ●                           | ○                       | ○                   | ●            | ◐                 |



|                    |   |   |   |   |   |   |   |   |   |   |
|--------------------|---|---|---|---|---|---|---|---|---|---|
| Kvehaugen, 2011    | ● | ● | ● | ● | ● | ● | ● | ● | ● | ● |
| Lampinen, 2006     | ● | ● | ● | ● | ● | ● | ● | ? | ● | ● |
| Lampinen, 2008     | ● | ● | ● | ● | ● | ◐ | ● | ◐ | ● | ● |
| Libby, 2007        | ● | ● | ● | ● | ● | ● | ○ | ● | ● | ● |
| Lykke, 2009        | ● | ● | ● | ● | ● | ● | ○ | ○ | ● | ● |
| Magnussen, 2009    | ● | ● | ● | ● | ● | ● | ○ | ● | ? | ? |
| Mahmud, 2008       | ● | ● | ● | ● | ● | ● | ● | ○ | ● | ● |
| Mangos, 2012       | ● | ● | ● | ● | ● | ● | ● | ● | ? | ● |
| Mannisto, 2013     | ● | ● | ● | ● | ● | ● | ● | ? | ● | ? |
| Manten, 2007       | ● | ● | ● | ● | ● | ● | ● | ● | ● | ● |
| Marín, 2000        | ● | ● | ● | ● | ● | ● | ○ | ? | ? | ? |
| McDonald, 2013     | ● | ● | ● | ● | ● | ● | ● | ○ | ● | ? |
| Melchiore, 2010    | ● | ● | ● | ● | ● | ● | ◐ | ○ | ? | ● |
| North, 1996        | ● | ● | ● | ● | ● | ● | ● | ? | ● | ● |
| Paradisi, 2011     | ● | ● | ● | ● | ● | ● | ● | ? | ● | ● |
| Portelinha, 2008   | ● | ● | ● | ● | ● | ● | ● | ● | ● | ● |
| Portelinha, 2010   | ● | ● | ● | ● | ● | ● | ● | ● | ● | ● |
| Pouta, 2004        | ● | ● | ● | ● | ● | ● | ● | ? | ● | ● |
| Romundstad, 2010   | ● | ● | ● | ● | ● | ● | ◐ | ● | ● | ● |
| Sandvik, 2013      | ● | ● | ● | ● | ● | ● | ● | ● | ● | ● |
| Sattar, 2003       | ● | ● | ● | ● | ● | ● | ● | ● | ● | ● |
| Scholten, 2013     | ● | ○ | ● | ● | ● | ● | ● | ● | ● | ● |
| Schreurs, 2015     | ● | ● | ● | ● | ● | ● | ● | ● | ? | ? |
| Smith, 2009        | ● | ● | ● | ● | ● | ● | ● | ● | ● | ● |
| Soonthornpun, 2009 | ● | ● | ● | ● | ● | ● | ● | ○ | ● | ● |
| Spaan, 2009        | ● | ● | ● | ● | ● | ● | ● | ● | ● | ● |
| Spaan, 2010        | ● | ● | ● | ● | ● | ● | ● | ● | ● | ● |
| Srinivas, 2009     | ● | ● | ● | ● | ● | ● | ○ | ● | ● | ● |



## Legend

| Relevance                                                                                                                                                                                                                                                                                                                                                                       | Validity                                                                                                                                                                                                                                                                                                                                                                                                                                                                                                                                                                                           |                                                                                                                                                                                                                                                                                                                                                                                                                                        |
|---------------------------------------------------------------------------------------------------------------------------------------------------------------------------------------------------------------------------------------------------------------------------------------------------------------------------------------------------------------------------------|----------------------------------------------------------------------------------------------------------------------------------------------------------------------------------------------------------------------------------------------------------------------------------------------------------------------------------------------------------------------------------------------------------------------------------------------------------------------------------------------------------------------------------------------------------------------------------------------------|----------------------------------------------------------------------------------------------------------------------------------------------------------------------------------------------------------------------------------------------------------------------------------------------------------------------------------------------------------------------------------------------------------------------------------------|
| <p>Patient</p> <ul style="list-style-type: none"> <li><input checked="" type="radio"/> Women without previous cardiovascular risk factors</li> <li><input checked="" type="radio"/> Both women with and without previous risk factors</li> <li><input type="radio"/> Women with cardiovascular risk factors prior to the HDP</li> </ul>                                         | <p>Design</p> <ul style="list-style-type: none"> <li><input checked="" type="radio"/> Prognostic longitudinal or cross sectional studies</li> <li><input checked="" type="radio"/> Etiological longitudinal studies</li> <li><input type="radio"/> Non longitudinal studies</li> </ul>                                                                                                                                                                                                                                                                                                             | <p>Outcome standardization</p> <ul style="list-style-type: none"> <li><input checked="" type="radio"/> Objective test (laboratory measurements or standardized physical examination) in means +/- SD or spread</li> <li><input checked="" type="radio"/> Only % of participant with risk factor (eq %DM)</li> <li><input type="radio"/> Subjective test (questionnaire)</li> </ul>                                                     |
| <p>Determinant</p> <ul style="list-style-type: none"> <li><input checked="" type="radio"/> Pre-eclampsia, gestational hypertension or both</li> <li><input checked="" type="radio"/> Hypertensive disease of pregnancy and obstetrical comorbidity</li> <li><input type="radio"/> Eclampsia, early pre-clampsia, HELLP (also when included in larger group of HDP's)</li> </ul> | <p>Selective inclusion</p> <ul style="list-style-type: none"> <li><input checked="" type="radio"/> Allocation in previous hypertensive disease of pregnancy group based on positive questionnaire or positive test result</li> <li><input type="radio"/> Allocation to normal pregnancy group based on negative questionnaire only</li> </ul>                                                                                                                                                                                                                                                      | <p>Outcome blinded</p> <ul style="list-style-type: none"> <li><input checked="" type="radio"/> History of patient (HDP/nHDP) unknown for individual measuring risk factor(s)</li> <li><input type="radio"/> History of patient (HDP/nHDP) known for individual measuring risk factor(s)</li> </ul>                                                                                                                                     |
| <p>Outcome</p> <ul style="list-style-type: none"> <li><input checked="" type="radio"/> Risk factors for cardiovascular disease: hypertension, diabetes, hyperlipidemia</li> <li><input type="radio"/> Other outcomes</li> </ul>                                                                                                                                                 | <p>Determinant standardization</p> <ul style="list-style-type: none"> <li><input checked="" type="radio"/> Objective test (physical examination reports, blood and/or urine samples)</li> <li><input checked="" type="radio"/> subjective test (questionnaire)</li> </ul> <p>Determinant blinded</p> <ul style="list-style-type: none"> <li><input checked="" type="radio"/> Measure(d) risk factors unknown for individual assessing history of patient (HDP/nHDP)</li> <li><input type="radio"/> Measure(d) risk factors known for individual assessing history of patient (HDP/nHDP)</li> </ul> | <p>Loss to follow up</p> <ul style="list-style-type: none"> <li><input checked="" type="radio"/> No</li> <li><input type="radio"/> Yes, &gt;10%</li> <li><input checked="" type="radio"/> Yes, but &lt;10%</li> </ul> <p>Missing data</p> <ul style="list-style-type: none"> <li><input checked="" type="radio"/> No</li> <li><input type="radio"/> Yes, &gt;10%</li> <li><input checked="" type="radio"/> Yes, but &lt;10%</li> </ul> |
| <p><input type="radio"/> Not reported</p>                                                                                                                                                                                                                                                                                                                                       |                                                                                                                                                                                                                                                                                                                                                                                                                                                                                                                                                                                                    |                                                                                                                                                                                                                                                                                                                                                                                                                                        |



## Supplement 3 – Baseline tables

**Table 2a.** Baseline characteristics of studies on blood pressure

| Author, year of publication | Cases*           | Sample size |         | Age     |         | Follow up (years) | Systolic (mmHg) | Diastolic (mmHg) |
|-----------------------------|------------------|-------------|---------|---------|---------|-------------------|-----------------|------------------|
|                             |                  | Case        | Control | Case    | Control |                   | mean (sd)       | mean (sd)        |
|                             |                  | n=          | n =     | (years) | (years) |                   |                 |                  |
| Alsnes, 2014(1)             | PE – mild        | 73          | 383     | 39.0    | 39.0    | 11                | 131 (3)         | 83 (11)          |
|                             | PE – moderate    | 91          |         |         |         |                   | 130 (3)         | 79 (1)           |
|                             | PE - severe      | 54          |         |         |         |                   | 126 (4)         | 79 (1)           |
| Barry, 2015(2)              | PE               | 49          | 22      | 33.4    | 34.6    | 1                 | 114 (11)        | 68 (8)           |
| Blaauw, 2010(3)             | PE               | 22          | 22      | 31.0    | 31.0    | <1                | 128 (9)         | 82 (9)           |
| Breetveld, 2015(4)          | PE               | 115         | 50      | 36.0    | 39.0    | 1                 | 117 (13)        | 74 (10)          |
| Canti, 2010(5)              | PE               | 40          | 14      | 39.0    | 37.0    | 10                | 121 (18)        | 82 (12)          |
| Collén, 2013(6)             | PE               | 25          | 17      | 63.0    | 63.0    | 40                | 144 (18)        | 87 (10)          |
| Drost, 2012(7)              | PE               | 339         | 332     | 38.9    | 39.4    | 10                | 127 (17)        | 86 (12)          |
| Drost, 2013(8)              | HDP              | 541         | 2851    | 38.4    | 40.8    | 5                 |                 |                  |
|                             |                  | 541         | 2851    | 46.7    | 44.4    | 10                | 118 (14)        | 76 (9)           |
|                             |                  | 642         | 2750    | 50.8    | 49.3    | 15                | 123 (16)        | 79 (11)          |
|                             |                  | 689         | 2703    | 54.1    | 55.4    | 20                | 128 (18)        | 81 (11)          |
| Ehrenthal, 2015(9)          | HDP              | 31          | 40      | 32.3    | 30.9    | 0.25              |                 |                  |
|                             |                  |             |         | 33.0    | 31.6    | 1                 | 117 (11)        | 78 (8)           |
|                             |                  |             |         |         |         |                   | 119( 12)        | 78 (9)           |
| Evans, 2011(10)             | PE               | 18          | 50      | 28.1    | 29.9    | 1                 | 107 (4)         | 68 (2)           |
| Girouard, 2007(11)          | PE<br>PIH<br>HDP | 63          | 168     | 27.4    | 27.0    | 7.8               | 115 (12)        | 75 (11)          |
|                             |                  |             |         | 35.5    | 34.0    | 8                 | 116 (13)        | 75 (9)           |
|                             |                  |             |         | 34.6    | 34.0    | 8                 | 115 (12)        | 75 (11)          |
| Freeman, 2004(12)           | PE               | 40          | 38      | 44.7    | 44.5    | 20                | 124 (15)        | 81 (10)          |
| Fuh, 1995(13)               | PE               | 13          | 13      | 28.0    | 29.0    | 6                 | 125 (3)         | 85 (3)           |
| Hamad, 2007(14)             | PE               | 18          | 17      | 31      | 30      | 1                 | 111 (10)        | 74 (9)           |
| Hashemi, 2013(15)           | HDP              | 226         | 226     | 35.7    | 35.7    | 6                 | 119 (0.1)       | 74 (8)           |
| Haukkammaa, 2009(16)        | PE               | 35          | 489     | 57.2    | 57.7    | 23                | 143 (22)        | 85 (9)           |
|                             | PIH              | 61          |         | 55.0    | 57.7    | 23                | 141(20)         | 83 (9)           |
| Heidema, 2015(17)           | PE               | 90          | 30      | 31.2    | 31.9    | 1                 | 123 (12)        | 74 (9)           |
| Hermes, 2013(18)            | HDP              | 306         | 99      | 32.0    | 33.0    | 1                 | 124 (13)        | 82 (10)          |
| Kaaja, 2005(19)             | PE               | 397         | 3162    | 47.9    | 46.0    | 27                | 134 (132-135)   | 79 (78-80)       |
| Kvehaugen, 2011(20)         | PE               | 26          | 15      | 37.2    | 40.5    | 6.5               | 120 (115-130)   | 74 (8)           |
| Lampinen, 2008(21)          | PE               | 28          | 20      | 38.0    | 36.0    | 8                 | 124 (113-138)   | 80 (75-92)       |
| Mahmud, 2008(22)            | PIH              | 54          | 101     | 42.0    | 43.0    | 8                 | 141(15)         | 89 (9)           |
| Manten, 2007(23)            | PE               | 97          | 32      | 31.0    | 33.0    | 0                 | 127 (12)        | 84 (9)           |
| Mc Donald, 2013(24)         | PE               | 109         | 218     | 49.0    | -       | 20                | 120 (19)        | 72 (8)           |
| North, 1996(25)             | PE               | 50          | 50      | 30      | 30      | 5                 | 127(17)         | 85 (13)          |
| Pouta, 2004(26)             | PE               | 94          | 1369    | 31.0    | 31.0    | 4.5               | 122 (115-135)   | 78 (71-87)       |
| Romundstad, 2010(27)        | PE               | 168         | 3057    | 27.2    | 26.9    | n.r.              | 138             | 82               |
|                             | PIH              | 93          | 3057    | 27.2    | 26.9    | n.r.              | 139             | 84               |
| Sandvik, 2013(28)           | PE               | 89          | 69      | 37.9    | 39.0    | 10                | 118 (16)        | 73 (12)          |
| Schreurs, 2015(29)          | PE               | 698         |         | 31.0    | -       | 1                 | 119 (12)        | 72 (9)           |
| Soonthornpun, 2009(30)      | PE               | 13          | 26      | 31.2    | 32.0    | 3.2               | 118 (11)        | 76 (12)          |
| Smith, 2009(31)             | PE               | 70          | 70      | 30.5    | 30.3    | 10                | 120 (12)        | 82 (10)          |
| Spaan, 2009(32)             | PE               | 22          | 29      | 49.0    | 49.8    | 23                | 132 (17)        | 80 (12)          |
| Spaan, 2010(33)             | PE               | 22          | 29      | 49.0    | 49.8    | 23                | 132 (17)        | 80 (12)          |
| Vallejo, 2010(34)           | PE               | 78          | -       | 31.5    | -       | 0.3               | 120 (10)        | 79 (6)           |
| Veerbeek, 2015(35)          | PE - late        | 76          | 0       | 34.2    | -       | n.r.              | 119 (2)         | 79 (1)           |
|                             | PIH              | 224         | 0       | 33.5    | -       | n.r.              | 124 (1)         | 82 (1)           |
| Watanabe, 2015(36)          | PIH              | 101         | 1084    | 47.7    | 46.5    | n.r.              | 114 (15)        |                  |

\* PE pre-eclampsia, PIH pregnancy induced hypertension, HDP hypertensive disorder of pregnancy

**Table 1b.** Baseline characteristics of studies on glucose metabolism

| Author, year of publication | Cases*        | Sample size |             | Age          |                 | Follow up (years) | Fasting glucose mmol/L (mean (sd) spread) | Fasting Insulin pmol/L (mean (sd) median spread) | HOMA -IR        |
|-----------------------------|---------------|-------------|-------------|--------------|-----------------|-------------------|-------------------------------------------|--------------------------------------------------|-----------------|
|                             |               | Case n=     | Control n = | Case (years) | Control (years) |                   |                                           |                                                  |                 |
| Al Nasiry, 2014(37)         | PE            | 28          | 20          | 32.0         | 31.0            | 1                 | 5.1 (3.5-19.1)                            | 69.02 (3.0-462.0)                                | 2.7 (0.3-17.6)  |
| Alsnes, 2014(1)             | PE – mild     | 73          | 383         | 39.0         |                 | 11                | 5.1 (0.1)                                 | 42.5 (3.5)                                       | 1.64 (0.16)     |
|                             | PE – moderate | 91          |             |              |                 |                   | 5.2 (0.1)                                 | 45.1 (3.3)                                       | 1.81 (0.15)     |
|                             | PE - severe   | 54          |             |              |                 |                   | 4.8 (0.1)                                 | 29.3 (4.3)                                       | 1.07 (0.02)     |
| Breetveld, 2015(4)          | PE            | 115         | 50          | 36.0         | 39.0            | 1                 | -                                         | 52.8 (28.2)                                      | 1.9 (1.1)       |
| Collén, 2013(6)             | PE            | 25          | 17          | 63.0         | 63.0            | 3                 | 6.0 (1.5)                                 | -                                                |                 |
| Ehrental, 2015(9)           | PE            | 31          | 40          | 32.0         | 30.6            | 1                 | -                                         | -                                                | 2.6 (1.9)       |
| Girouard, 2007              | PE            | 63          | 168         | 27.4         | 27.0            | 7.8               | 5.1 (0.5)                                 | 108 (50)                                         | 2.00**          |
|                             | PIH           | 105         |             | 35.5         | 34.0            | 8                 | 5.2 (0.8)                                 | 124 (90)                                         | 2.3**           |
|                             | HDP           | 168         |             | 34.6         | 34.0            | 8                 | 5.2 (0.7)                                 | 91 (53)                                          | 1.7**           |
| Innes, 2005(38)             | PE            | 13          | 13          | 37.0         | 38.2            | 4                 | 4.8 (0.1)                                 | 81.0 (13.8)                                      | 1.7**           |
| Hashemi, 2013(15)           | H DP          | 226         | 226         | 35.7         | 35.7            | 10                | 4.9 (4.5-5.5)                             | -                                                |                 |
| Haukammaa, 2009(16)         | PE            | 35          | 489         | 57.2         | 57.2            | 23                | 6.2 (1.5)                                 | 68.6 (39.6)                                      | 1.6**           |
|                             | PIH           | 61          |             | 55.0         |                 | 23                | 5.7 (0.8)                                 | 70.1 (43)                                        | 1.35**          |
| Heidema, 2015(17)           | PE            | 90          | 30          | 31.2         | 31.9            | 1                 | 5.0 (0.6)                                 | 89.4 (51)                                        | 3.5 (2.3)       |
| Hermes, 2013(18)            | HDP           | 306         | 99          | 32.0         | 33.0            | 3                 | 4.7 (4.5-5.1)                             | 26.4 (12-46.6)                                   | 1.0 (0.4-1.6)   |
| Lampinen, 2008(21)          | PE            | 28          | 20          | 38.0         | 36.0            | 8                 | 4.5 (4.2-4.7)                             | 20.1 (13.9-40.3)                                 |                 |
| Mangos, 2012(39)            | PE            | 39          | 35          | 37           | 38.0            | 3.8               | 4.8 (0.6)                                 | 42 (30-66)                                       | 1.50 (1.2-2.1)  |
|                             | PIH           | 27          |             | 36.0         |                 | 2.9               | 5.2 (0.6)                                 | 42 (30-66)                                       | 1.7 (1.1-2.5)   |
| Manten, 2007(23)            | PE            | 97          | 32          | 31.0         | 33.0            | 0                 | -                                         | -                                                | 2.0 (0.91-10)   |
| Sandvik, 2013(28)           | PE            | 89          | 69          | 37.9         | 39.0            | 10                | 4.89 (1.02)                               | 22.2(12-33)                                      | 0.79(0.42-1.25) |
| Sattar, 2003(40)            | PE            | 40          | 40          | 43.0         | 44.0            | 19                | -                                         | 50.1 (31.8-76.8)                                 | -               |
| Schreurs, 2015(29)          | PE            | 698         | -           |              | 31.0            | 1                 | 5.0 (0.7)                                 | 66.6 (34.2)                                      | -               |
| Spaan, 2010(33)             | PE            | 22          | 29          | 49.0         | 49.8            | 23                | 5.0 (0.4)                                 | 49.8 (40.8-84)                                   | 2.0 (1.6-3.2)   |
| Vallejo, 2010(34)           | PE            | 78          | -           | 31.5         | -               | 0.3               | 4.8 (0.8)                                 | -                                                | -               |
| Veerbeek, 2015(35)          | PE - late     | 76          | 0           | 34.2         |                 |                   | 4.8 (0.09)                                | 37.9 (0.5)                                       | 1.37 (0.18)     |
|                             | PIH           | 224         | 0           | 33.5         |                 |                   | 4.8 (0.05)                                | 37.02 (2.6)                                      | 1.37 (0.11)     |
| Watanabe, 2015(36)          | PIH           | 101         | 1084        | 47.7         | 46.5            | -                 | 5.0 (0.6)                                 | -                                                |                 |
| Wolf, 2004(41)              | PE            | 29          | 32          | 33.7         | 30.7            | 2                 | 4.5 (0.4)                                 | 84 (54,108)***                                   | 2.80 (1.7-4.00) |

\* PE pre-eclampsia, PIH pregnancy induced hypertension, HDP hypertensive disorder of pregnancy; \*\* calculated with HOMA calculator <https://www.dtu.ox.ac.uk/homacalculator/download.php>; \*\*\*Median, interquartile ranges

**Table 2c. Baseline characteristics of studies on lipids**

| Author, year of publication | Case        | Sample size |             | Age          |                 | Follow up (years) | HDL-C (mean (sd/spread) Mmol/l) | LDL-C (mean (sd/spread) Mmol/l) |
|-----------------------------|-------------|-------------|-------------|--------------|-----------------|-------------------|---------------------------------|---------------------------------|
|                             | PE/PIH/H DP | Case n=     | Control n = | Case (years) | Control (years) |                   |                                 |                                 |
| Al Nasiry, 2014(37)         | PE          | 742         | -           | 32.0         | 31.0            | 1                 | 1.3 (0.5-20.0)                  | -                               |
| Andersgaard, 2012(42)       | PE          | 901         | 7187        | 48.8         | 47.4            | 25.4              | 1.61 (1.58-1.64)                | -                               |
| Barden, 1999(43)            | PIH         | 607         |             | 45.2         | 47.4            | 21.0              | 1.57 (1.54-1.60)                |                                 |
|                             | PE          | 62          | 84          | 27.6         | 27.5            | 6w                | 1.31 (0.05)                     | 3.49 (0.24)                     |
| Barry, 2015(2)              | PE          | 49          | 22          | 33.4         | 34.6            | 1                 | 1.16 (0.22)                     | 2.67 (2.2-3.2)                  |
| Breetveld, 2015(4)          | PE          | 115         | 50          | 36.0         | 39.0            | 1                 | 1.31 (0.25)                     | 2.89 (0.63)                     |
| Girouard, 2007(11)          | PE          | 63          | 168         | 35.5         | 35.1            | 8                 | 1.33 (0.32)                     | 2.90 (0.85)                     |
|                             | PIH         | 105         |             | 34.0         | 35.1            | 8                 | 1.28 (0.30)                     | 2.78 (0.83)                     |
|                             | HDP         | 168         |             | 34.6         | 35.1            | 8                 | 1.30 (0.30)                     | 2.83 (0.84)                     |
| Hashemi, 2013(15)           | HDP         | 226         | 226         | 35.7         | 35.7            | 6                 | 1.11 (0.26)                     | 3.2 (0.93)                      |
| Haukkamaa, 2009(16)         | PE          | 35          | 489         | 57.2         | 57.2            | 23                | 1.7 (0.5)                       | -                               |
|                             | PIH         | 61          |             | 55.0         |                 | 23                | 1.7 (0.4)                       | -                               |
| Heidema, 2015(17)           | PE          | 90          | 30          | 31.2         | 31.9            | 1                 | 1.1 (0.3)                       | -                               |
| Hermes, 2013(18)            | HDP         | 306         | 99          | 32.0         | 33.0            | 3                 | 1.36 (1.16-1.56)                | -                               |
| Innes, 2005(38)             | PE          | 13          | 13          | 37.0         | 38.2            | 4                 | 1.21 (0.08)                     | -                               |
| Kvehaugen, 2011             | PE          | 26          | 15          | 37.2         | 40.5            | 6.5               | 1.50 (0.38)                     | 2.89 (1.6-7.2))                 |
| Mahmud, 2008(22)            | PIH         | 54          | 101         | 42.0         | 43.0            | 8                 | 1.28 (0)                        | -                               |
| Mangos, 2012(39)            | PE          | 39          | 35          | 37           | 38.0            | 3.8               | 1.4 (0.3)                       | 3.1 (0.6)                       |
|                             | PIH         | 27          |             | 36.0         |                 | 2.9               | 1.3 (0.3)                       | 3.1 (0.7)                       |
| Manten, 2007(23)            | PE          | 97          | 32          | 31.0         | 33.0            | 0                 | 1.37 (0.32)                     | -                               |
| McDonald, 2013(24)          | PE          | 109         | 218         | 49.0         | -               | 20                | 1.6 (1.3-1.8)                   | 3.0 (2.6-3.7)                   |
| Portelinha, 2010(44)        | PE          | 90          | 60          | 34.0         | 34.0            | 6                 | 1.23 (1.08)                     | 4.98 (1.03)                     |
| Sandvik, 2013(28)           | PE          | 89          | 69          | 37.9         | 39.0            | 10                | 1.51 (0.36)                     | 3.00 (0.79)                     |
| Sattar, 2003(40)            | PE          | 40          | 40          | 43.0         | 44.0            | 19                | 1.55 (1.3-1.8)                  | 2.85 (2.5-3.6)                  |
| Schreurs, 2015(29)          | PE          | 698         |             |              | 31.0            | 1                 | 1.4 (0.8)                       | 3.0 (0.8)                       |
| Soonthornpun, 2009(30)      | PE          | 13          | 26          | 31.2         | 32.0            | 3.2               | 1.06 (0.24)                     | 3.15 (1.38)                     |
| Vallejo, 2010 (33)          | PE          | 78          | -           | 31.5         | -               | 0.3               | 1.62 (0.4)                      | 2.9 (0.9)                       |
| Veerbeek, 2015(35)          | PE - late   | 76          | 0           | 34.2         | -               | n.r.              | 1.34 (0.04)                     | 2.93 (0.01)                     |
|                             | PIH         | 224         | 0           | 33.5         | -               | n.r.              | 1.44 (0.02)                     | 2.85 (0.06)                     |
| Watanabe, 2015(36)          | PIH         | 101         | 1084        | 47.7         | 46.5            | -                 | 1.8 (0.45)                      | 3.08 (0.74)                     |

## References

1. Alsnes IV, Janszky I, Forman MR, Vatten LJ, Okland I. A population-based study of associations between preeclampsia and later cardiovascular risk factors. *American journal of obstetrics and gynecology*. 2014;211(6):657.e1-7.
2. Barry DR, Utzschneider KM, Tong J, Gaba K, Leotta DF, Brunzell JD, et al. Intraabdominal fat, insulin sensitivity, and cardiovascular risk factors in postpartum women with a history of preeclampsia. *American journal of obstetrics and gynecology*. 2015;213(1):104.e1-11.
3. Blaauw J, Souwer ETD, Coffeng S, Smit AJ, Aarnoudse JG, Van Doormaal JJ, et al. Longitudinal study on cardiovascular risk markers in women with a history of severe early-onset preeclampsia. *Pregnancy hypertension*. 2010;1:S58-S9.
4. Breetveld NM, Ghossein-Doha C, van Kuijk S, van Dijk AP, van der Vlugt MJ, Heidema WM, et al. Cardiovascular disease risk is only elevated in hypertensive, formerly preeclamptic women. *BJOG : an international journal of obstetrics and gynaecology*. 2015;122(8):1092-100.
5. Canti IC, Komlos M, Martins-Costa SH, Ramos JG, Capp E, Corleta H. Risk factors for cardiovascular disease ten years after preeclampsia. *Sao Paulo medical journal = Revista paulista de medicina*. 2010;128(1):10-3.
6. Collen AC, Hellgren M, Gustafsson H, Johansson MC, Manhem K. Cardiovascular and metabolic characteristics 40 years after hypertensive pregnancies: a long-term follow-up study of mothers. *Journal of hypertension*. 2013;31(4):758-65.
7. Drost JT, Arpaci G, Ottervanger JP, de Boer MJ, van Eyck J, van der Schouw YT, et al. Cardiovascular risk factors in women 10 years post early preeclampsia: the Preeclampsia Risk Evaluation in FEMales study (PREVFEM). *European journal of preventive cardiology*. 2012;19(5):1138-44.
8. Drost JT, van der Schouw YT, Maas AH, Verschuren WM. Longitudinal analysis of cardiovascular risk parameters in women with a history of hypertensive pregnancy disorders: the Doetinchem Cohort Study. *BJOG : an international journal of obstetrics and gynaecology*. 2013;120(11):1333-9.
9. Ehrental DB, Rogers S, Goldstein ND, Edwards DG, Weintraub WS. Cardiovascular risk factors one year after a hypertensive disorder of pregnancy. *Journal of Women's Health*. 2015;24(1):23-9.
10. Evans CS, Gooch L, Flotta D, Lykins D, Powers RW, Landsittel D, et al. Cardiovascular system during the postpartum state in women with a history of preeclampsia. *Hypertension*. 2011;58(1):57-62.
11. Girouard J, Giguere Y, Moutquin JM, Forest JC. Previous hypertensive disease of pregnancy is associated with alterations of markers of insulin resistance. *Hypertension*. 2007;49(5):1056-62.
12. Freeman DJ, McManus F, Brown EA, Cherry L, Norrie J, Ramsay JE, et al. Short- and long-term changes in plasma inflammatory markers associated with preeclampsia. *Hypertension*. 2004;44(5):708-14.
13. Fuh MM, Yin CS, Pei D, Sheu WH, Jeng CY, Chen YI, et al. Resistance to insulin-mediated glucose uptake and hyperinsulinemia in women who had preeclampsia during pregnancy. *American journal of hypertension*. 1995;8(7):768-71.
14. Hamad RR, Eriksson MJ, Silveira A, Hamsten A, Bremme K. Decreased flow-mediated dilation is present 1 year after a pre-eclamptic pregnancy. *Journal of hypertension*. 2007;25(11):2301-7.
15. Hashemi S, Ramezani Tehrani F, Mehrabi Y, Azizi F. Hypertensive pregnancy disorders as a risk factor for future cardiovascular and metabolic disorders (Tehran Lipid and Glucose Study). *The journal of obstetrics and gynaecology research*. 2013;39(5):891-7.
16. Haukkamaa L, Moilanen L, Kattainen A, Luoto R, Kahonen M, Leinonen M, et al. Preeclampsia is a risk factor of carotid artery atherosclerosis. *Cerebrovascular diseases (Basel, Switzerland)*. 2009;27(6):599-607.
17. Heidema WM, Scholten RR, Lotgering FK, Spaanderman ME. History of preeclampsia is more predictive of cardiometabolic and cardiovascular risk factors than obesity. *European journal of obstetrics, gynecology, and reproductive biology*. 2015;194:189-93.

18. Hermes W, Tamsma JT, Grootendorst DC, Franx A, van der Post J, van Pampus MG, et al. Cardiovascular risk estimation in women with a history of hypertensive pregnancy disorders at term: a longitudinal follow-up study. *BMC pregnancy and childbirth*. 2013;13:126.
19. Kaaja R, Kinnunen T, Luoto R. Regional differences in the prevalence of pre-eclampsia in relation to the risk factors for coronary artery disease in women in Finland. *European heart journal*. 2005;26(1):44-50.
20. Kvehaugen AS, Dechend R, Ramstad HB, Troisi R, Fugelseth D, Staff AC. Endothelial function and circulating biomarkers are disturbed in women and children after preeclampsia. *Hypertension*. 2011;58(1):63-9.
21. Lampinen KH, Ronnback M, Groop PH, Kaaja RJ. A relationship between insulin sensitivity and vasodilation in women with a history of preeclamptic pregnancy. *Hypertension*. 2008;52(2):394-401.
22. Mahmud A, Jatoi M, Chee YR, Feely J. History of gestational hypertension is associated with the metabolic syndrome and masked hypertension but not arterial stiffness in women with essential hypertension. *Journal of clinical hypertension (Greenwich, Conn)*. 2008;10(1):21-6.
23. Manten GT, Sikkema MJ, Voorbij HA, Visser GH, Bruinse HW, Franx A. Risk factors for cardiovascular disease in women with a history of pregnancy complicated by preeclampsia or intrauterine growth restriction. *Hypertension in pregnancy*. 2007;26(1):39-50.
24. McDonald SD, Ray J, Teo K, Jung H, Salehian O, Yusuf S, et al. Measures of cardiovascular risk and subclinical atherosclerosis in a cohort of women with a remote history of preeclampsia. *Atherosclerosis*. 2013;229(1):234-9.
25. North RA, Simmons D, Barnfather D, Upjohn M. What happens to women with preeclampsia? Microalbuminuria and hypertension following preeclampsia. *The Australian & New Zealand journal of obstetrics & gynaecology*. 1996;36(3):233-8.
26. Pouta A, Hartikainen AL, Sovio U, Gissler M, Laitinen J, McCarthy MI, et al. Manifestations of metabolic syndrome after hypertensive pregnancy. *Hypertension*. 2004;43(4):825-31.
27. Romundstad PR, Magnussen EB, Smith GD, Vatten LJ. Hypertension in pregnancy and later cardiovascular risk: common antecedents? *Circulation*. 2010;122(6):579-84.
28. Sandvik MK, Leirgul E, Nygard O, Ueland PM, Berg A, Svarstad E, et al. Preeclampsia in healthy women and endothelial dysfunction 10 years later. *American journal of obstetrics and gynecology*. 2013;209(6):569.e1-.e10.
29. Schreurs MP, Cipolla MJ, Al-Nasiry S, Peeters L, Spaanderman M. Formerly eclamptic women have lower nonpregnant blood pressure compared with formerly pre-eclamptic women: a retrospective cohort study. *BJOG : an international journal of obstetrics and gynaecology*. 2015;122(10):1403-9.
30. Soonthornpun K, Soonthornpun S, Wannaro P, Setasuban W, Thamprasit A. Insulin resistance in women with a history of severe pre-eclampsia. *The journal of obstetrics and gynaecology research*. 2009;35(1):55-9.
31. Smith GN, Walker MC, Liu A, Wen SW, Swansburg M, Ramshaw H, et al. A history of preeclampsia identifies women who have underlying cardiovascular risk factors. *American journal of obstetrics and gynecology*. 2009;200(1):58.e1-8.
32. Spaan JJ, Ekhart T, Spaanderman ME, Peeters LL. Remote hemodynamics and renal function in formerly preeclamptic women. *Obstetrics and gynecology*. 2009;113(4):853-9.
33. Spaan JJ, Houben AJ, Musella A, Ekhart T, Spaanderman ME, Peeters LL. Insulin resistance relates to microvascular reactivity 23 years after preeclampsia. *Microvascular research*. 2010;80(3):417-21.
34. Vallejo Vaz AJ, Guisado ML, Garcia-Junco PS, Andreu EP, Morillo SG, Ortiz JV. Differences in the prevalence of metabolic syndrome and levels of C-reactive protein after puerperium in women with hypertensive disorders during pregnancy. *Hypertension research : official journal of the Japanese Society of Hypertension*. 2010;33(10):1012-7.
35. Veerbeek JH, Hermes W, Breimer AY, van Rijn BB, Koenen SV, Mol BW, et al. Cardiovascular disease risk factors after early-onset preeclampsia, late-onset preeclampsia, and pregnancy-induced hypertension. *Hypertension*. 2015;65(3):600-6.
36. Watanabe K, Kimura C, Iwasaki A, Mori T, Matsushita H, Shinohara K, et al. Pregnancy-induced hypertension is associated with an increase in the prevalence of cardiovascular disease risk factors in Japanese women. *Menopause (New York, NY)*. 2015;22(6):656-9.

37. Al-Nasiry S, Ghossein-Doha C, Polman S, Lemmens S, Scholten R, Heidema W, et al. Metabolic syndrome after pregnancies complicated by pre-eclampsia or small for gestational age: a retrospective cohort. *BJOG : an international journal of obstetrics and gynaecology*. 2014.
38. Innes KE, Weitzel L, Laudenslager M. Altered metabolic profiles among older mothers with a history of preeclampsia. *Gynecologic and obstetric investigation*. 2005;59(4):192-201.
39. Mangos GJ, Spaan JJ, Pirabhahar S, Brown MA. Markers of cardiovascular disease risk after hypertension in pregnancy. *Journal of hypertension*. 2012;30(2):351-8.
40. Sattar NR, J.; Crawford, L.; Cheyne, H.; Greer, I.A. . Classic and novel risk factor parameters in women with a history of preeclampsia. *Hypertension*. 2003;42(1):39-42.
41. Wolf M, Hubel CA, Lam C, Sampson M, Ecker JL, Ness RB, et al. Preeclampsia and future cardiovascular disease: potential role of altered angiogenesis and insulin resistance. *The Journal of clinical endocrinology and metabolism*. 2004;89(12):6239-43.
42. Andersgaard AB, Acharya G, Mathiesen EB, Johnsen SH, Straume B, Oian P. Recurrence and long-term maternal health risks of hypertensive disorders of pregnancy: a population-based study. *American journal of obstetrics and gynecology*. 2012;206(2):143.e1-8.
43. Barden AE, Beilin LJ, Ritchie J, Walters BN, Michael C. Does a predisposition to the metabolic syndrome sensitize women to develop pre-eclampsia? *Journal of hypertension*. 1999;17(9):1307-15.
44. Portelinha A, Belo L, Cerdeira AS, Braga J, Tejera E, Pinto F, et al. Lipid levels including oxidized LDL in women with history of preeclampsia. *Hypertension in pregnancy*. 2010;29(1):93-100.
